# Supplementary figures and images for: ROS-PIASγ cross talk channelizes ATM signaling from resistance to apoptosis during chemosensitization of resistant tumors
Source: PubMed Central journal article supplement — Cell Death Dis. 2014 Jan 23;5(1):e1021–. doi: 10.1038/cddis.2013.534 (PMC4040699; doi:10.1038/cddis.2013.534), 2014-01-23

A

## Sensitive cells (MCF-7)

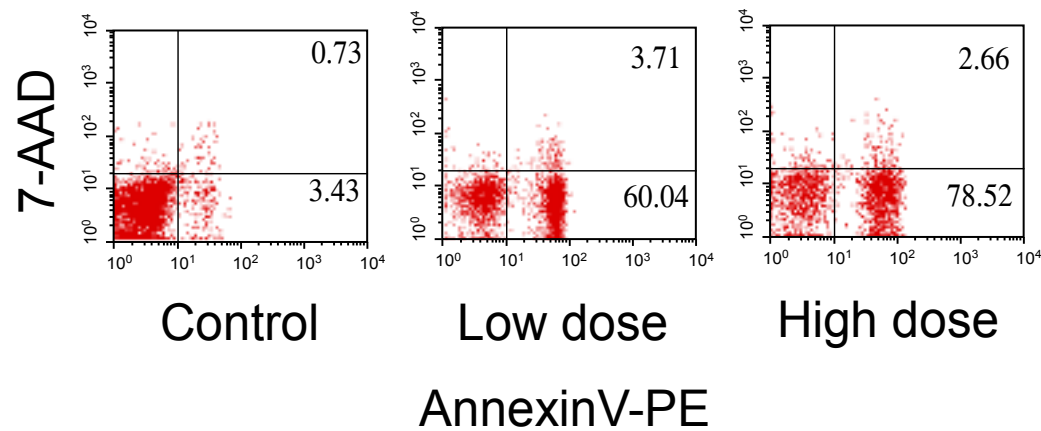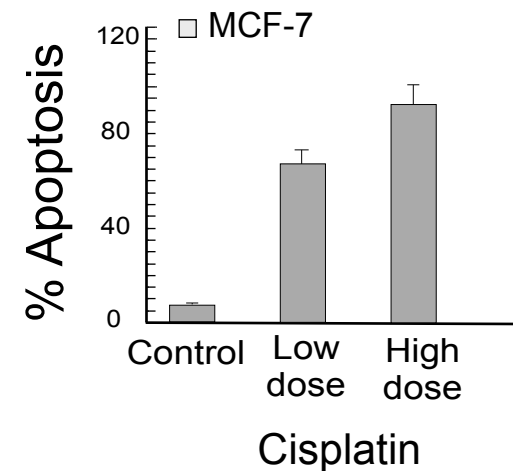

B

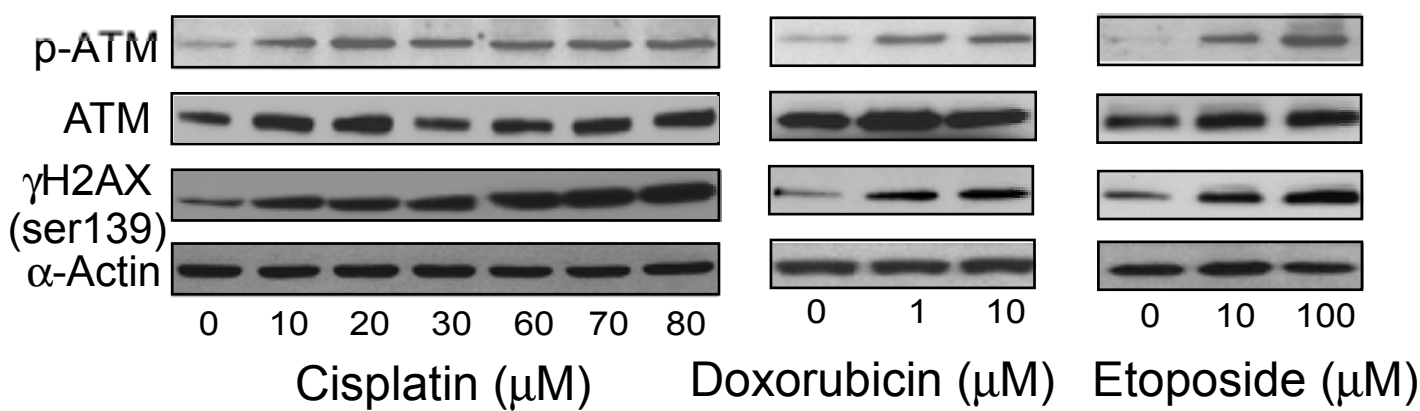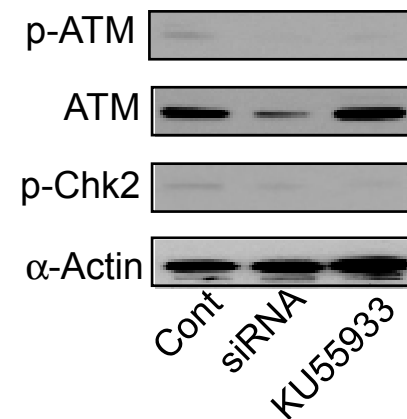

□ Control-siRNA

■ ATM-siRNA

□ Control

■ KU55933

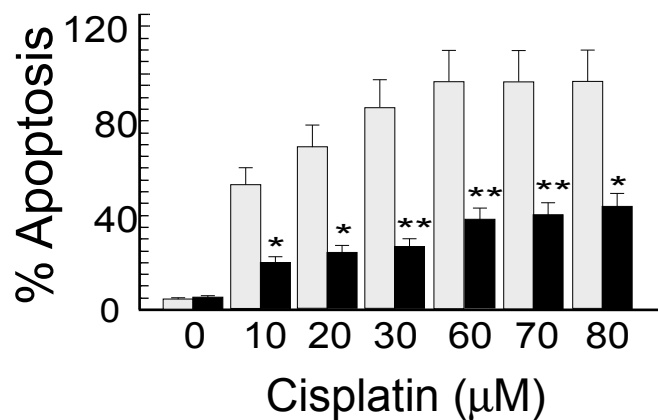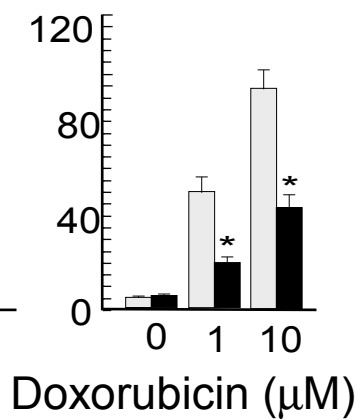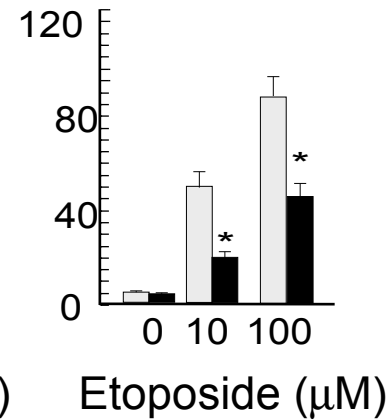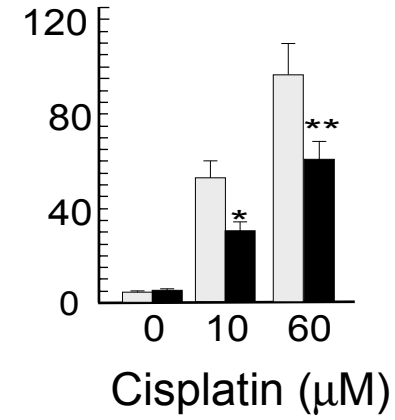

Supplement: cddis2013534x1.pdf [file cddis2013534x1.pdf]
